# Supplementary material for: Transcriptome profiling of caspase-2 deficient EμMyc and Th-MYCN mouse tumors identifies distinct putative roles for caspase-2 in neuronal differentiation and immune signaling
Source: PubMed Central journal article supplement (PMC6343006; doi:10.1038/s41419-018-1296-0), 2019-01-22
Supplement: 41419_2018_1296_MOESM2_ESM.pdf [file 41419_2018_1296_MOESM2_ESM.pdf]

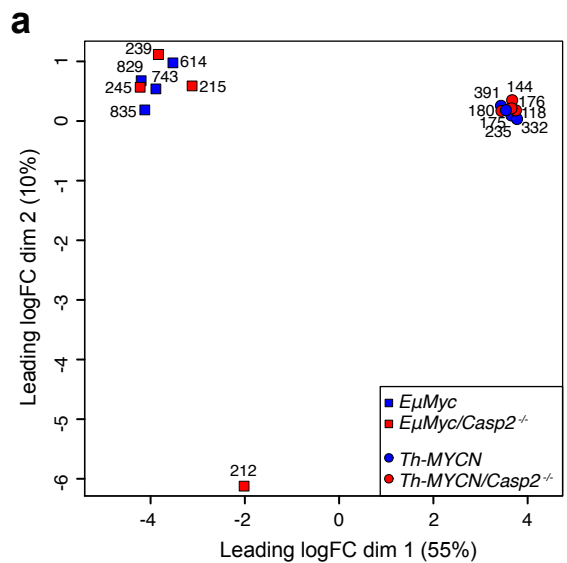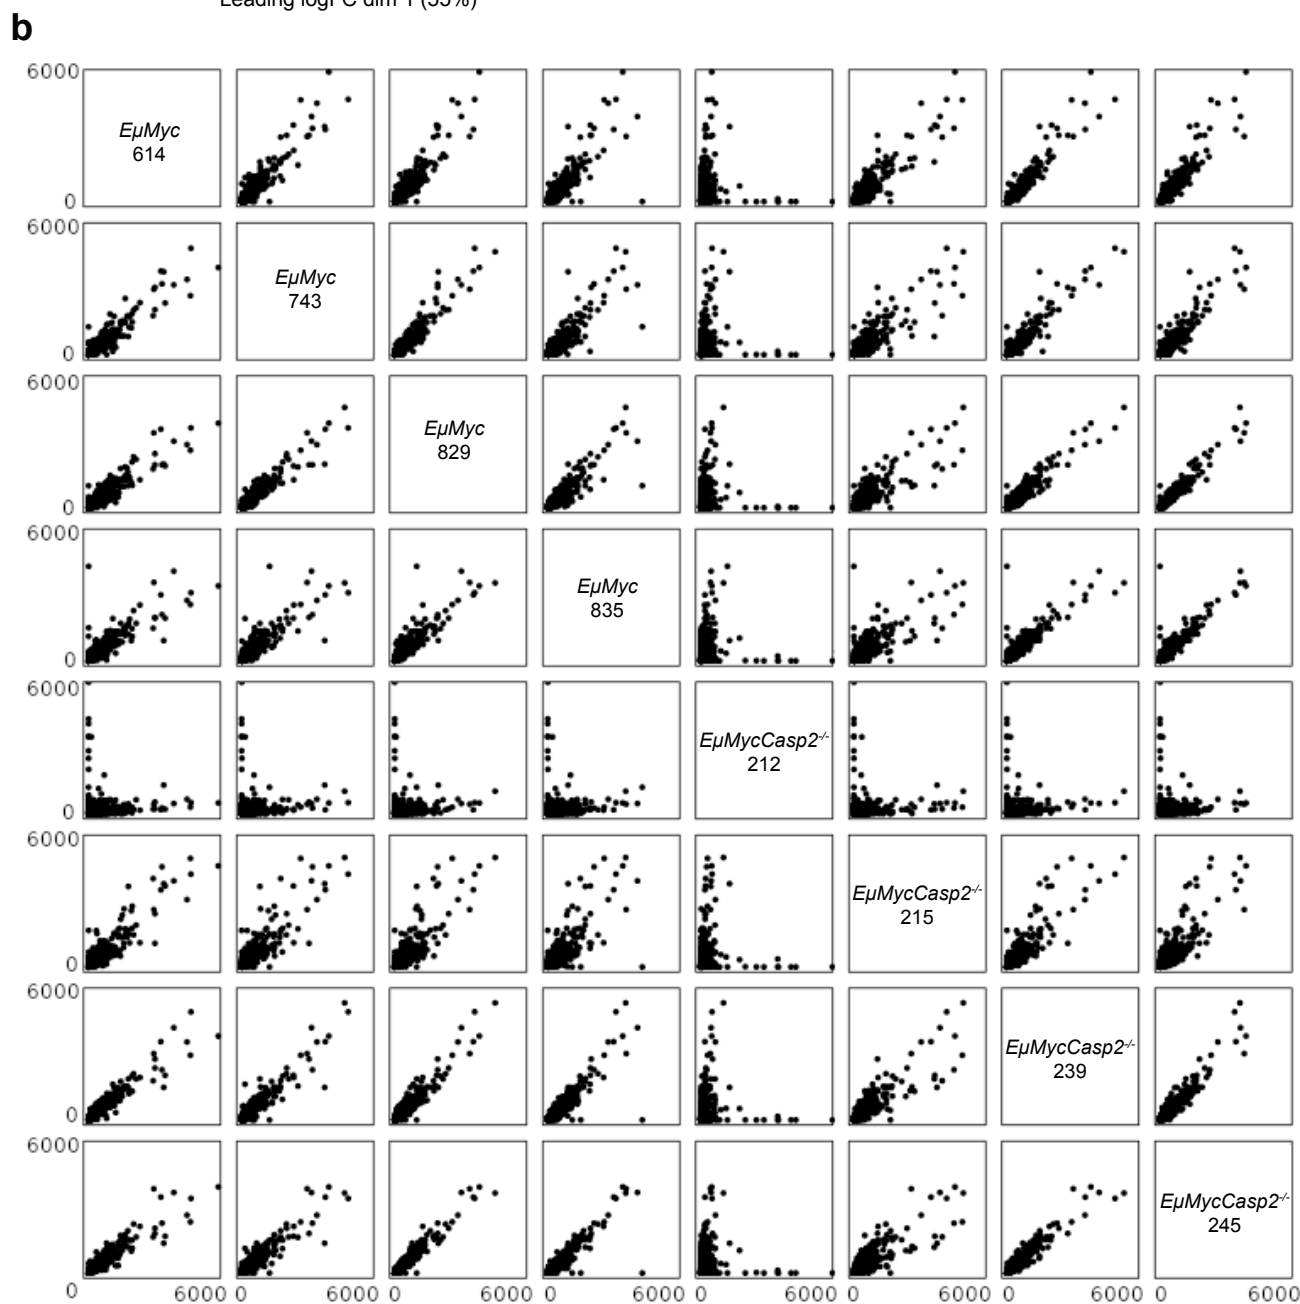

Supplementary Figure S1

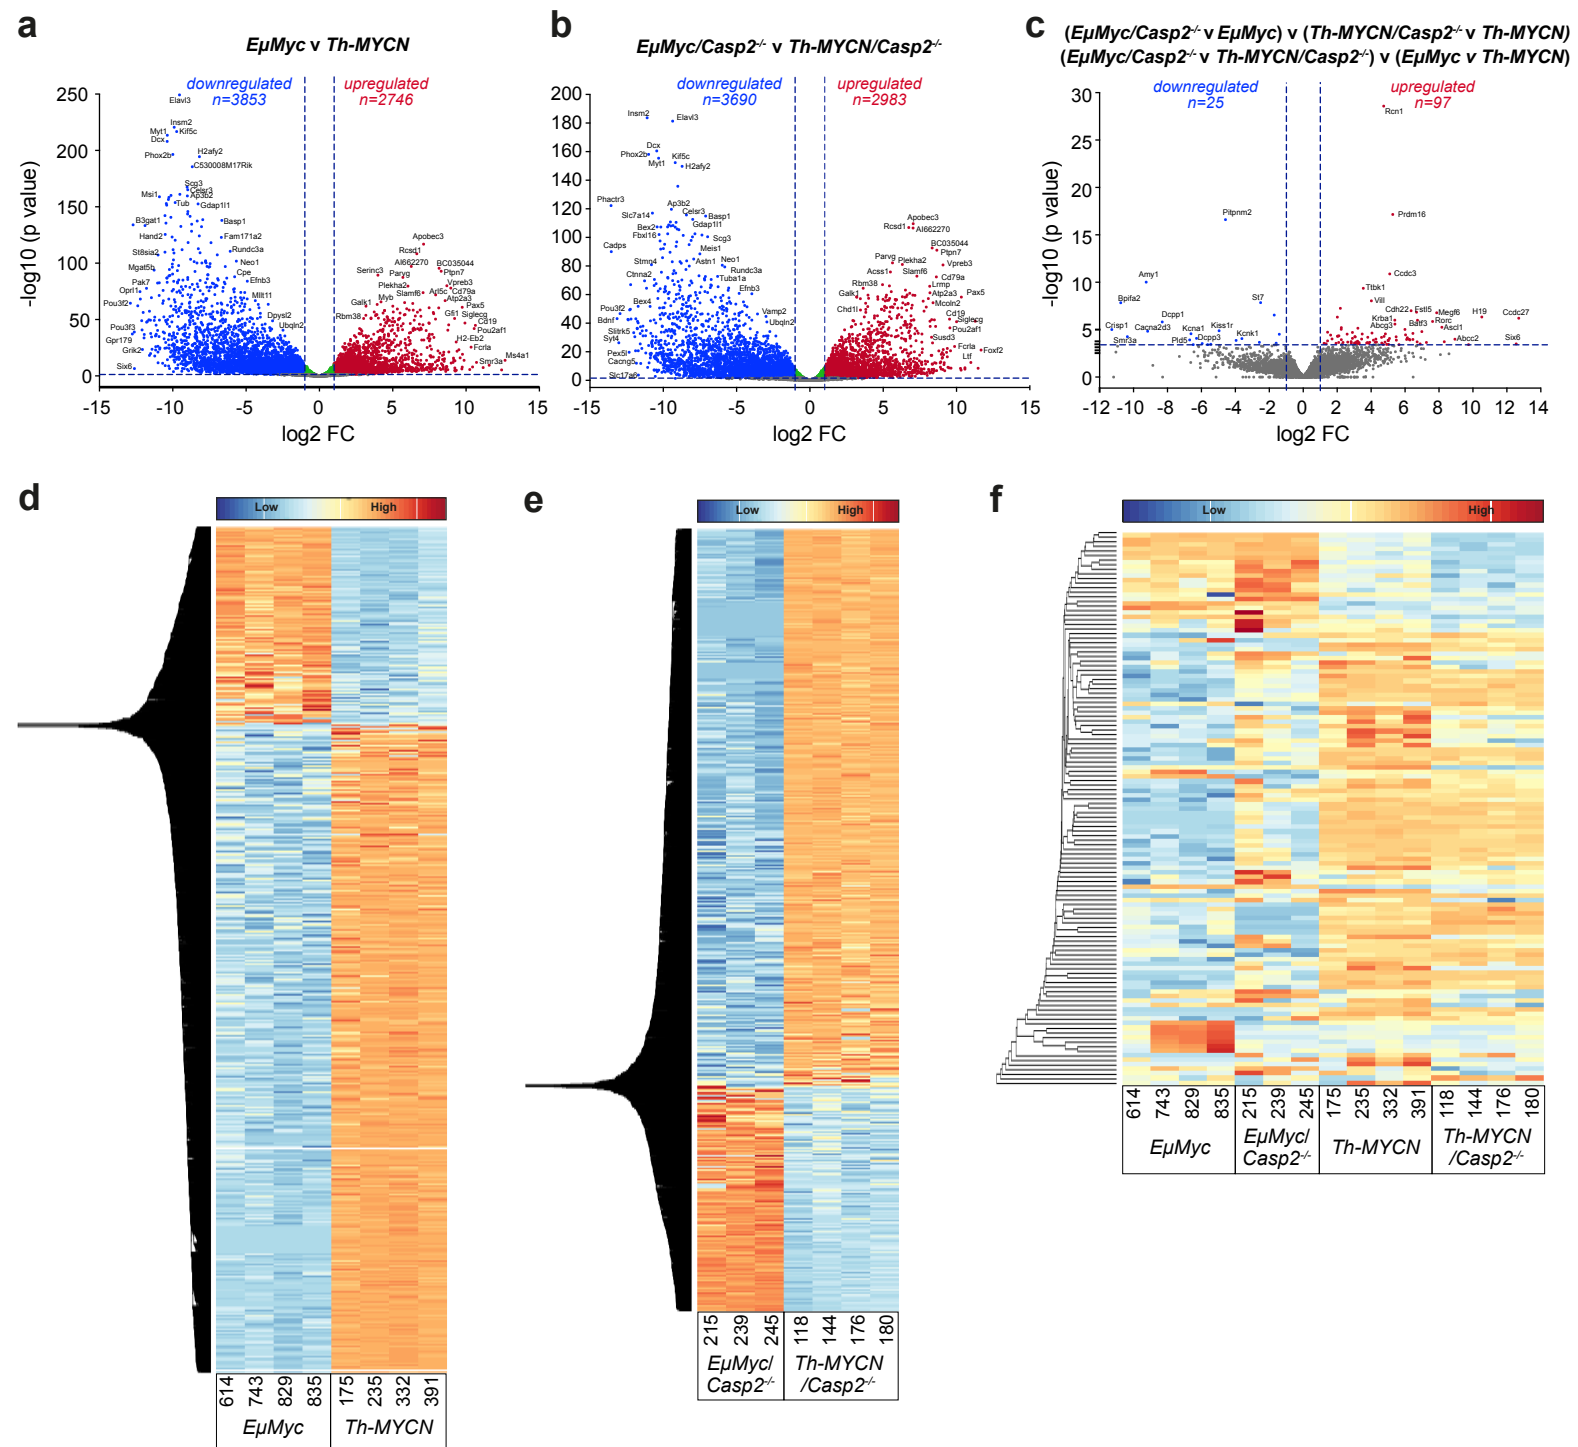

Supplementary Figure S2

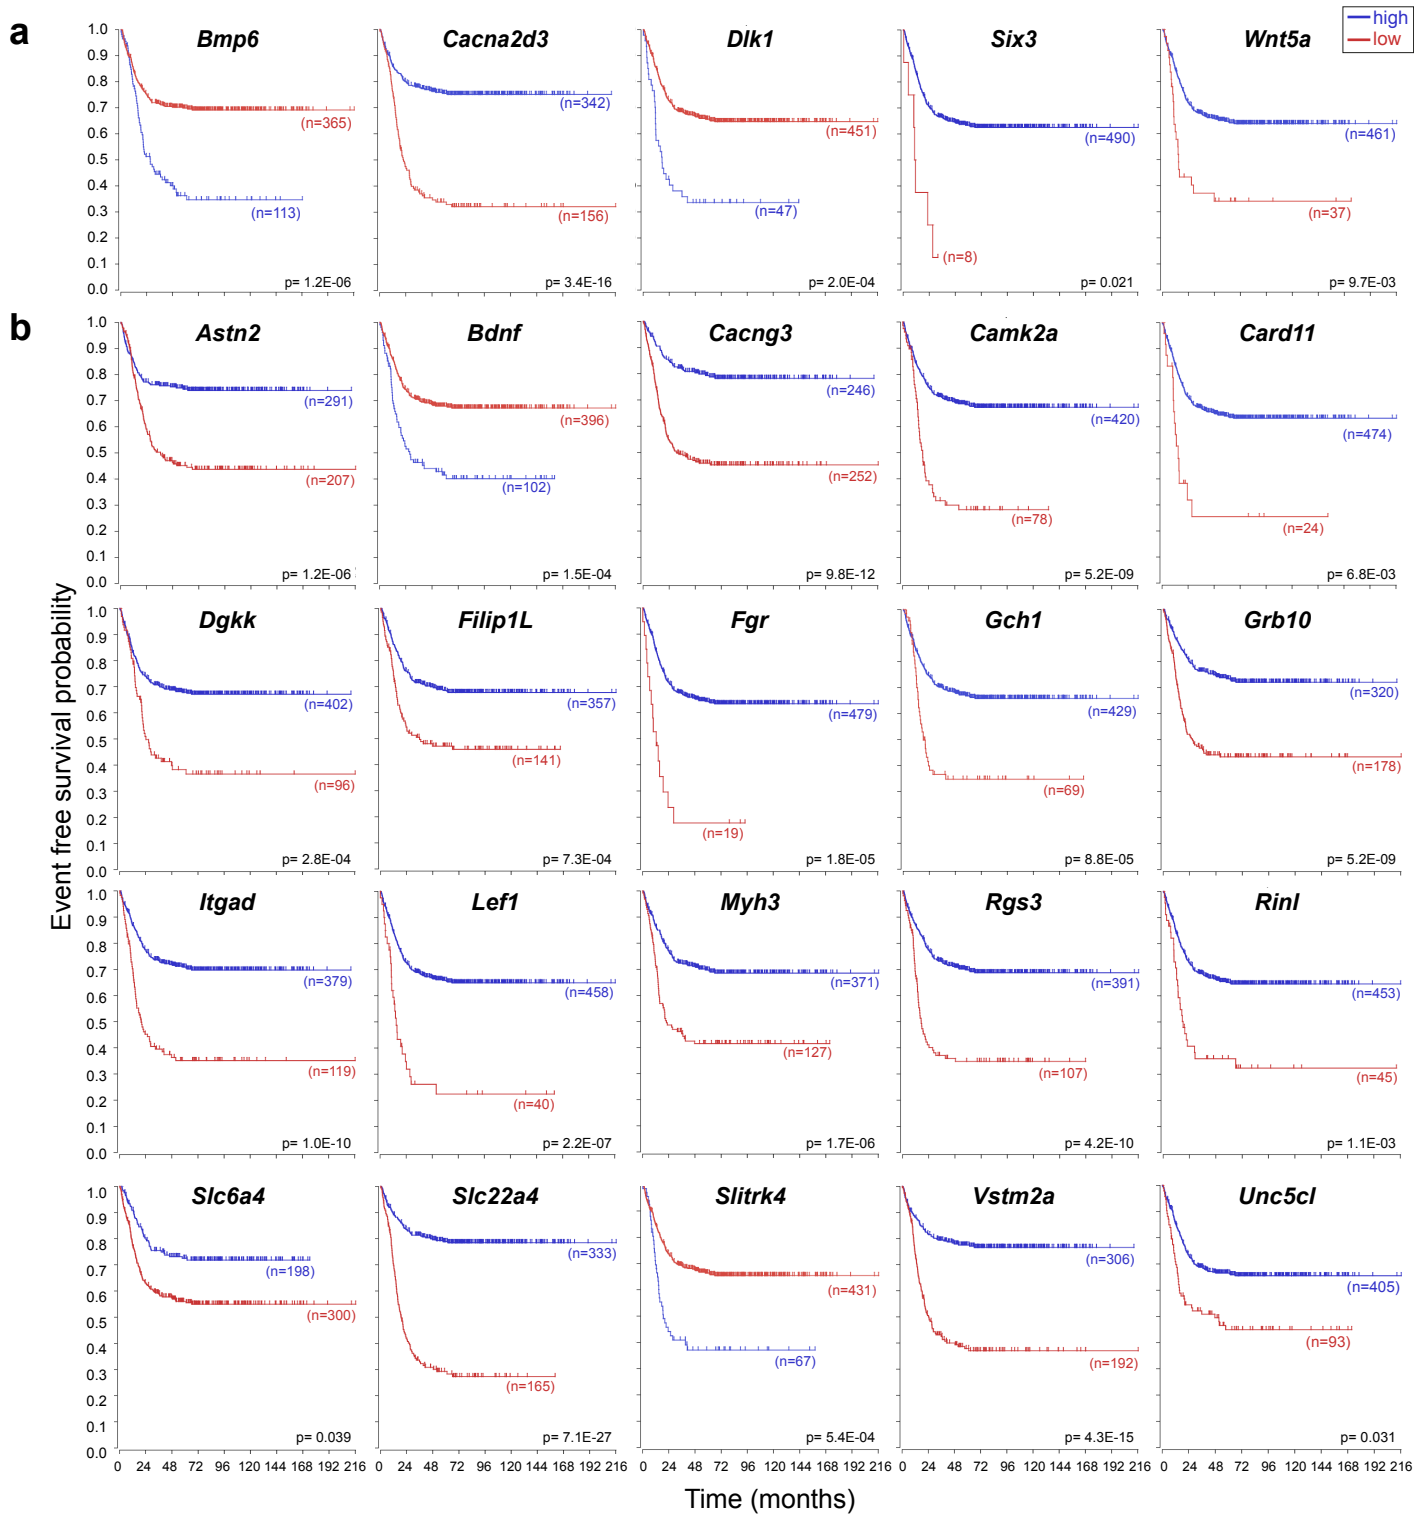

**Supplementary Figure S3**

**a**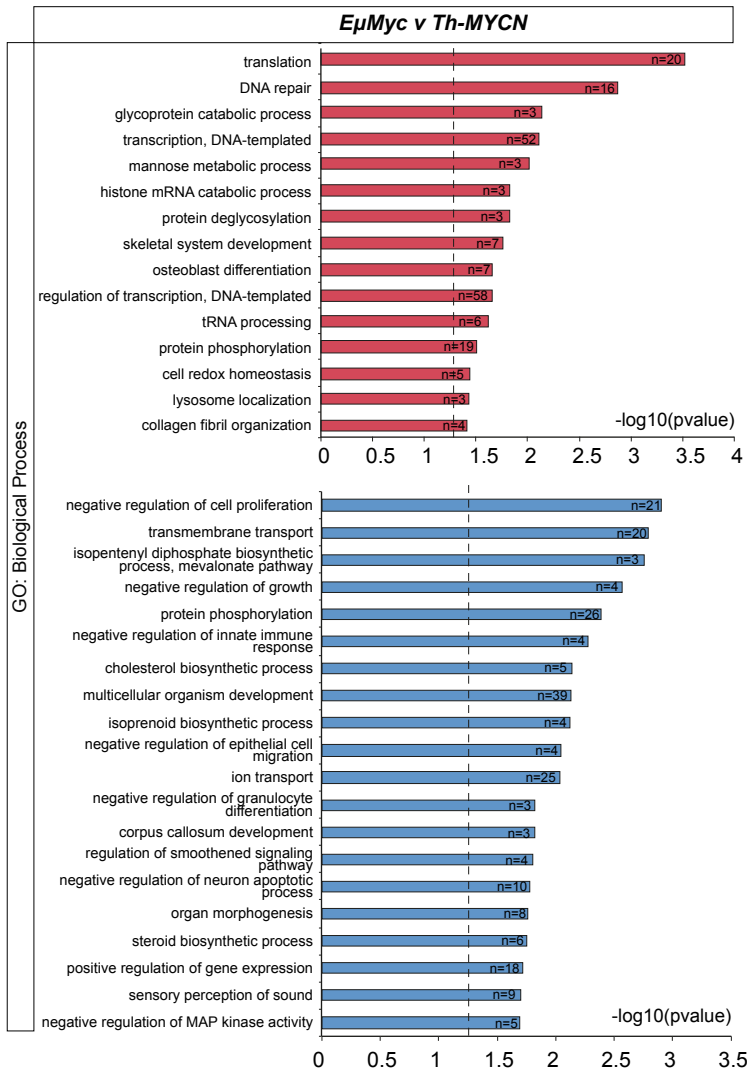**b**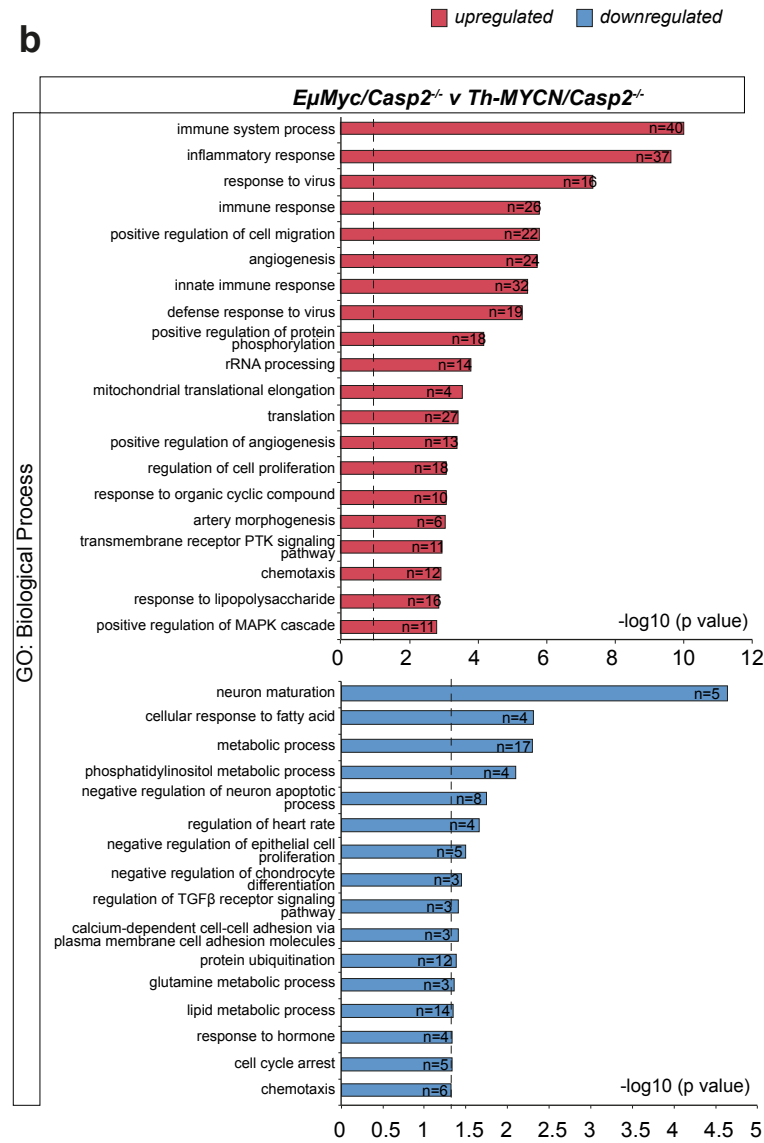**c**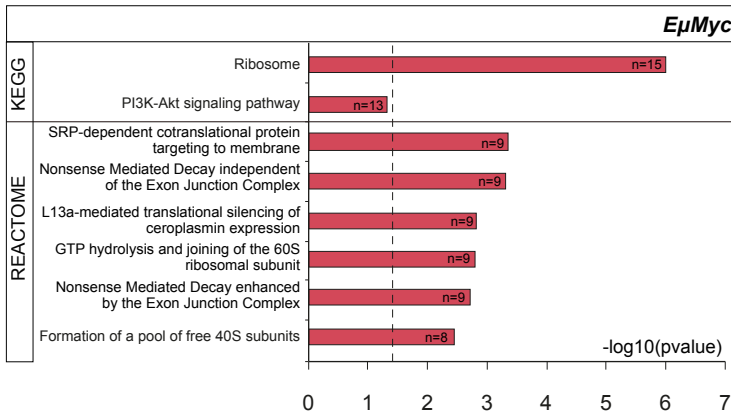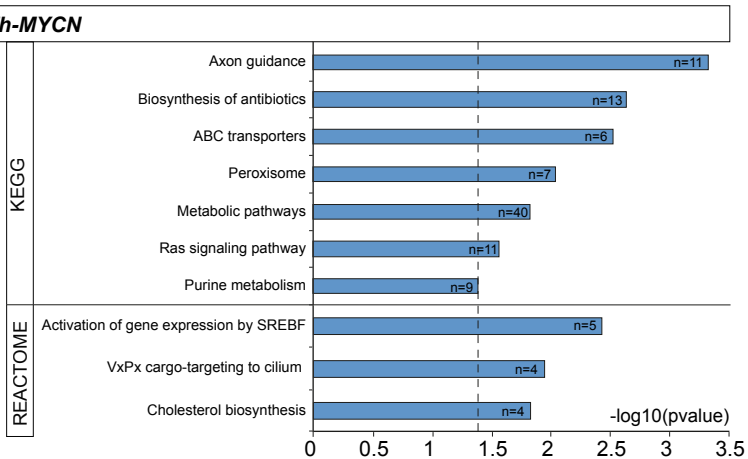**Supplementary Figure S4**
